# Supplementary material for: All-aromatic liquid crystal triphenylamine-based poly(azomethine)s as hole transport materials for opto-electronic applications
Source: Royal Society of Chemistry journal article supplement (doi:10.1039/b919159c), 2009-12-11
Supplement: b919159c.pdf [file b919159c.pdf]

### Supplementary Data

## All-aromatic Liquid Crystal Triphenylamine-based Poly(azomethine)s as Hole Transport Materials for Optoelectronic Applications

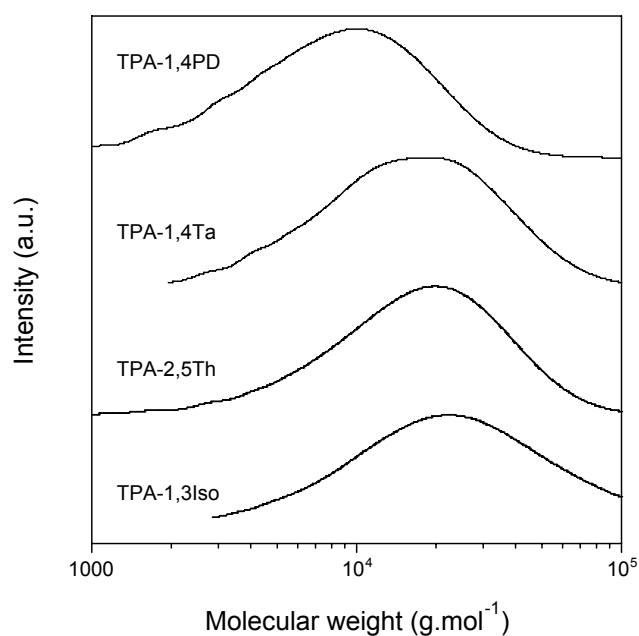

**Figure I.** Molecular weight distribution curves of the TPA-based polyazomethines.

| Polymer          | $M_n$<br>(g mol <sup>-1</sup> ) | $M_w$<br>(g mol <sup>-1</sup> ) | PD   | TGA, 5% wt<br>loss (N <sub>2</sub> ) (°C) | DSC<br>$T_g$ (°C) |
|------------------|---------------------------------|---------------------------------|------|-------------------------------------------|-------------------|
| <b>TPA-14PD</b>  | 5700                            | 10500                           | 1.86 | 450                                       | 301               |
| <b>TPA-14Ta</b>  | 11700                           | 20500                           | 1.74 | 449                                       | 310               |
| <b>TPA-25Th</b>  | 11800                           | 21300                           | 1.80 | 405                                       | 263               |
| <b>TPA-13Iso</b> | 16000                           | 57500                           | 3.57 | 452                                       | 251               |

**Table I.** Polymer molecular weight data and thermal analysis data (recorded at  $10\text{ }^{\circ}\text{C min}^{-1}$ ). The molecular weight data were calculated relative to polystyrene standards. *N*-methylpyrrolidone (NMP) with 5mM of LiBr was used as the eluent at a flow rate of  $0.5\text{ mL min}^{-1}$  at  $60^{\circ}\text{C}$ .

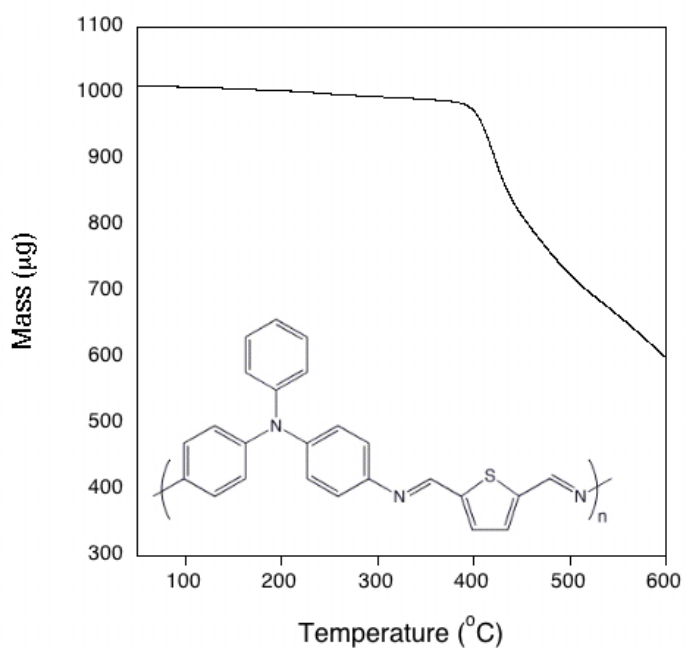

A

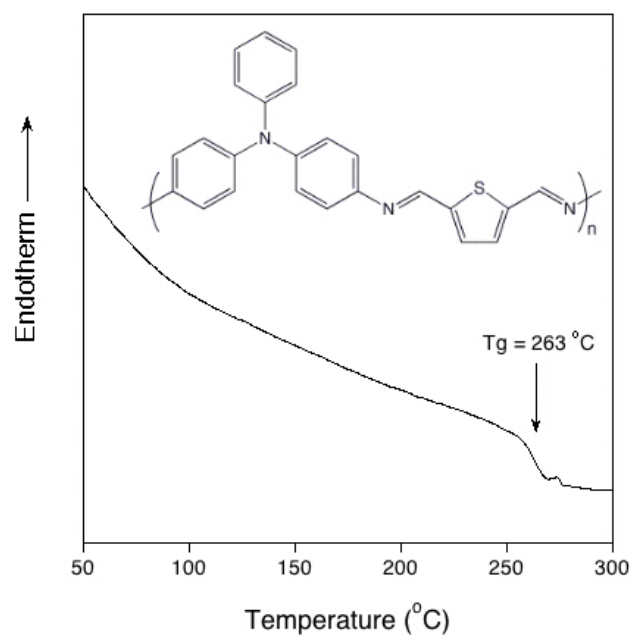

B

**FIGURE II.** *A-TGA thermogram of TPA-25Th recorded under a nitrogen atmosphere at 10 °C min<sup>-1</sup>; B-DSC trace of TPA-25Th; first heat recorded at 10 °C min<sup>-1</sup>.*
